# Supplementary material for: Responses to Ixekizumab in Male and Female Patients with Psoriatic Arthritis: Results from Two Randomized, Phase 3 Clinical Trials
Source: PubMed Central journal article supplement — Rheumatol Ther. 2022 Apr 9;9(3):919–33. doi: 10.1007/s40744-022-00445-w (PMC9127019; doi:10.1007/s40744-022-00445-w), 2022-04-09
Supplement: 40744_2022_445_MOESM1_ESM.pdf [file 40744_2022_445_MOESM1_ESM.pdf]

## **SUPPLEMENTARY MATERIAL**

### **Responses to ixekizumab in male and female patients with psoriatic arthritis: results from two randomized, phase 3 clinical trials**

Lihi Eder, MD, PhD<sup>1</sup>; Hans-Peter Tony, MD, PhD<sup>2</sup>; Satish Odhav, MD<sup>3</sup>; Eva Galindez Agirregoikoa, MD<sup>4</sup>; Mariusz Korkosz, MD<sup>5</sup>; Sergio Schwartzman, MD<sup>6</sup>; Aubrey Trevelin Sprabery, MD<sup>7</sup>; Amanda M Gellett, PhD<sup>7</sup>; So Young Park, PhD<sup>7</sup>; Clinton C Bertram, PhD<sup>7</sup>; Alexis Ogdie, MD<sup>8</sup>

<sup>1</sup>Women's College Hospital, Department of Medicine, University of Toronto, Toronto, ON, Canada; <sup>2</sup>University Hospital of Würzburg, Rheumatology/Clinical Immunology, Würzburg, Germany; <sup>3</sup>Arthritis Clinic, Jackson, TN, United States; <sup>4</sup>Rheumatology Department, University Hospital Basurto, Bilbao, Spain; <sup>5</sup>Jagiellonian University Medical College, Kraków, Poland; <sup>6</sup>The Hospital for Special Surgery, New York, New York, United States; <sup>7</sup>Eli Lilly and Company, Indianapolis, IN, United States; <sup>8</sup>Penn Medicine, Philadelphia, PA, United States

**Corresponding author:** Lihi Eder, MD, PhD

Women's College Research Institute

76 Grenville St, 6th Floor

Toronto, Canada

Email: [Lihi.eder@wchospital.ca](mailto:Lihi.eder@wchospital.ca)

Telephone: 1-416-323-6400 ext. 5108

Fax: 1-416-323-6115

**Supplemental Figure 1.** Percentage of male and female patients receiving placebo achieving (a, b) ACR20/50/70, (c, d) MDA/VLDA, and (e, f) DAPSA LDA/DAPSA Remission through 24 weeks.

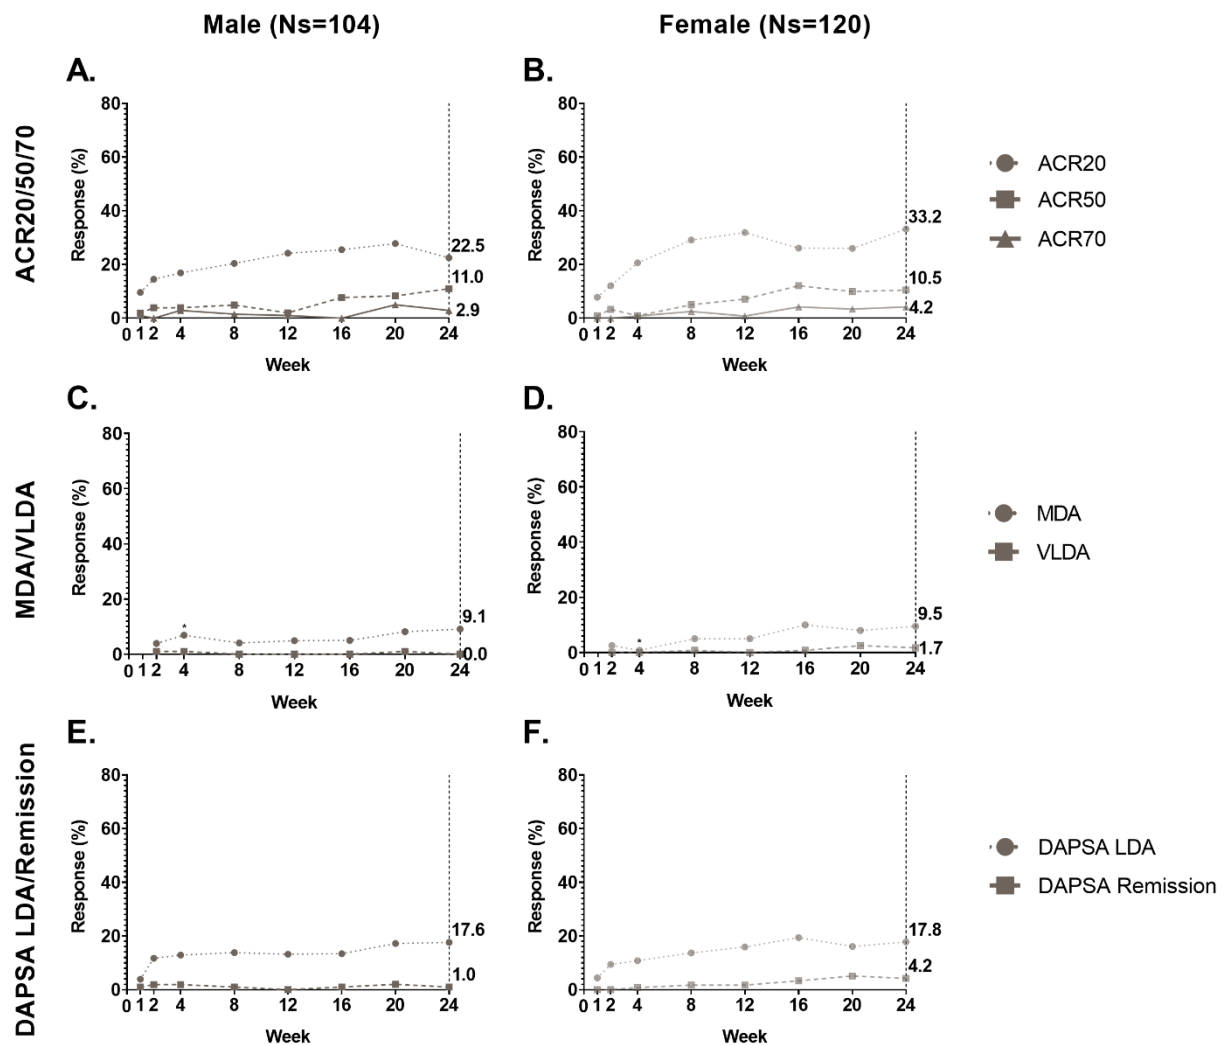

Missing data was imputed by mNRI. P values were calculated for proportions of male vs. female responders; \*p<0.05. ACR20/50/70 = 20%, 50%, or 70% improvement from baseline in the American College of Rheumatology criteria; DAPSA = Disease Activity Index for Psoriatic Arthritis; LDA=Low Disease Activity; MDA = Minimal Disease Activity; mNRI = modified non-responder imputation; N = number of patients in the analysis population; VLDA = Very Low Disease Activity.

**Supplemental Figure 2.** Changes from baseline in male and female patients treated with placebo for a) TJC, b) SJC, c) Pain VAS, d) PtGA, e) PhGA, f) HAQ-DI, g) CRP, h) PASI, and i) LEI through 156 weeks.

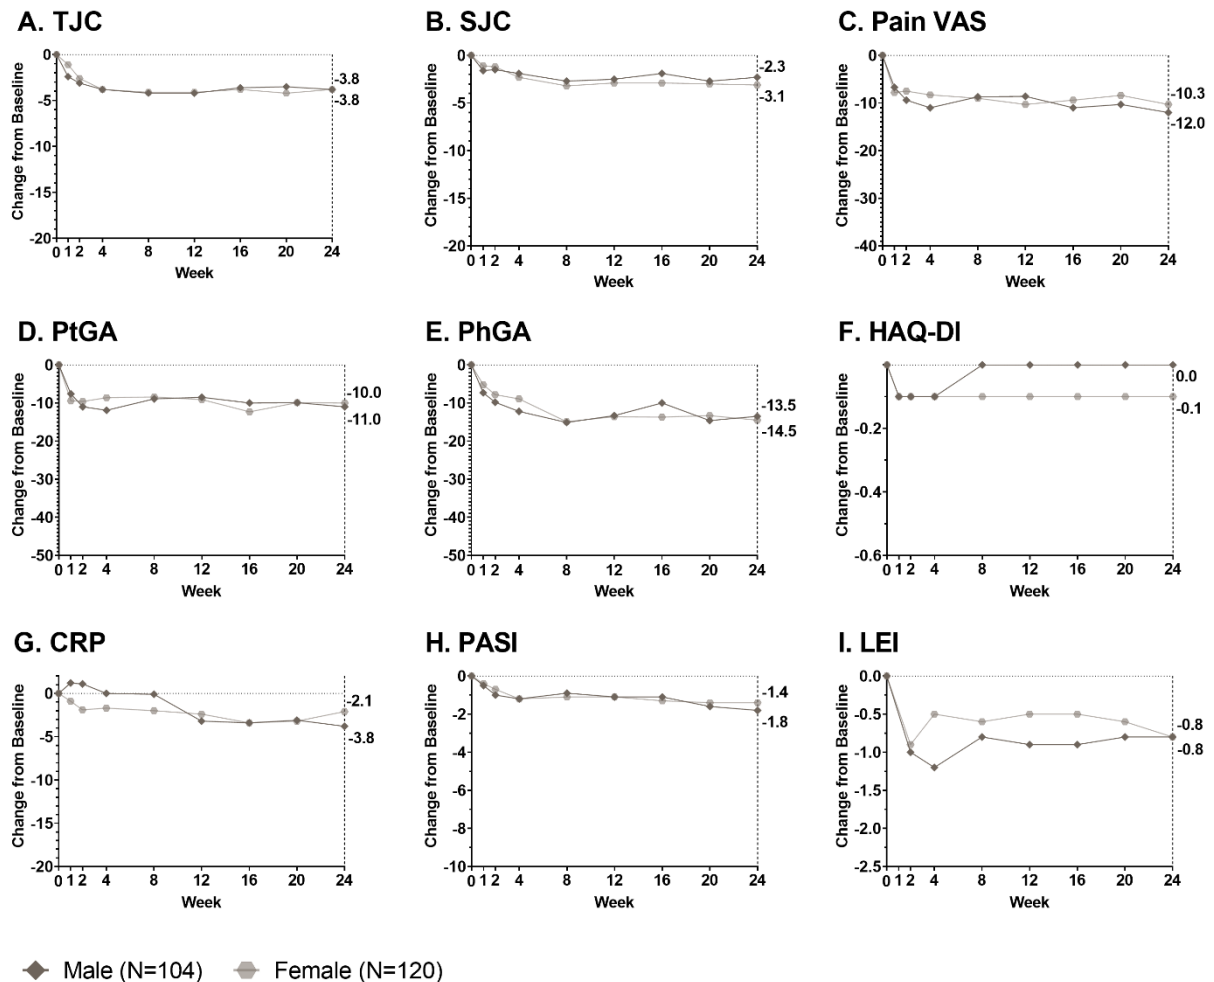

Missing data were imputed by mBOCF. TJC includes 68 joints; SJC includes 66 joints. Pain VAS, PtGA, and PhGA are measured on a 0–100 scale. HAQ-DI is measured on a 0–3 scale. CRP is measured in mg/L. PASI is measured on a 0–72 scale. LEI is measured on a 0–6 scale.

CRP = C-reactive protein; HAQ-DI = Health Assessment Questionnaire Disability Index; LEI = Leeds Enthesitis Index; mBOCF = modified baseline observation carried forward; Ns = number of patients in subgroup; Pain VAS = pain visual analog scale;

PASI = Psoriasis Area and Severity Index; PhGA = Physician's Global Assessment of Disease Activity; PsA = psoriatic arthritis; PtGA = Patient's Global Assessment of Disease Activity; SJC = swollen joint count; TJC = tender joint count.
